# Supplementary material for: Interactive virtual fieldtrip as a tool for remote education
Source: Copernicus journal article supplement (doi:10.5194/gc-2021-21), 2021-07-21
Supplement: Supplementary file [file gc-2021-21-AC1-supplement.pdf]

The paper suggests that virtual fieldwork during the Covid-19 pandemic could be used as a tool for examining field study areas and plenty of information is supplied. The paper suggests advantages and disadvantages of virtual against actual fieldwork but does state that virtual fieldwork should not be a substitute for actual fieldwork. However, this paper does not give any specific objectives for the students to study although it suggests under the discussion section that they were looking at geomorphological principles. There is no questionnaire given on which the evaluation discussion is based. It is stated that the students seemed to recommend the idea of Virtual Field Trips although there is no mention of follow up actual field work here.

The goal was two-fold: the virtual fieldtrip was presented to undergraduate students of Geomorphology, and therefore they had the opportunity to “visit” an area that is not within their curricula; so they were able to get acquainted with different geomorphological processes and environments. The virtual fieldtrip was also used in the framework of a series of virtual fieldtrips for Erasmus+ CIVIS. Given that your comment regards to clarify any specific objectives for the students to study, we will try to update this part in our revised manuscript.

Regarding the questionnaire for the evaluation, we can provide the link for the questionnaire used and describe some further information regarding its design and purpose.

The idea of virtual fieldwork is useful as a precursor to actual fieldwork, and the paper is interesting from that viewpoint.

We thank you for the comment and we agree. Virtual fieldtrips can be very useful to prepare students for the actual fieldtrip, so that they may put emphasis on more methodological or mapping issues during the live fieldwork. We will try to highlight this point of view in our revised manuscript.

I was not able to access the story map at the given point.

Not sure why this happened, the link now seems to work fine.

I found some difficulty with some of the language use, possibly because of translation issues and have suggested alternatives below. This looks excessive but will add to the ease of reading.

Thank for the language improvements, we will incorporate them in the revised version of our manuscript.
