# Supplementary material for: Interactive virtual fieldtrip as a tool for remote education
Source: Copernicus journal article supplement (doi:10.5194/gc-2021-21), 2021-07-21
Supplement: Supplementary file [file gc-2021-21-AC2-supplement.pdf]

## General comments

I do not believe there is not enough original content in this paper for it to be published. The lead author has self-cited throughout and has included much of their own work in Section 3 that is far too detailed and irrelevant for the paper. The authors have already published results of a similar survey (likely conducted simultaneously as the cohort is the same) in the same Geoscience Communication special issue “Virtual field trips as a tool for indirect geomorphological experience: a case study from the southeastern part of the Gulf of Corinth, Greece”. In my opinion, the results presented here should have been included in that publication.

I agree with the points Mohadjer has raised, and, if the authors wish to publish these results, I encourage them to develop this paper considerably in light of the comments below and the suggestions raised by Mohadjer.

We have studied in detail both your comments and the comments posted by Solmaz Mohadjer. We will take into consideration both reviewers suggestions, in order to improve the context and objectives of our manuscript.

## Specific comments

24 This is supposition – do you mean field trips can support the classroom-taught principles? I wouldn't say they allow students to understand concepts in any certain terms.

We are not sure we understand the comment. In our point of view, in order for students to better comprehend what they are taught in the class, field trips are a very important part as they can examine sites themselves and see in nature what they sometimes see theoretically through a sketch or a photograph.

40 I'm not convinced this example of the challenges of Greek educators visiting another location is particularly relevant. It's obvious that actual fieldtrips require transportation, time, and resources, it's not necessary to add a weak example.

Thank you for the comment. We will modify this part accordingly.

45 I think you can be satisfied the reader will know what weather conditions are – no need to add examples.

We will remove the examples.

49 Careful with your use of 'paramount significance' here! Is it really? Do you present the evidence?

You are correct. The phrase was somewhat an exaggeration, we will modify this sentence accordingly.

67 I'm confused about your approach and thinking here. Are you testing a hypothesis that virtual field trips are useful supplements but not substitutes to actual field trips? You seem to be suggesting here that you know this already....so why study it?

Well yes, the hypothesis is that virtual field trips are useful supplements but not substitutes and this is why we also included the feedback from our students. We can upgrade this part accordingly.

82-84 of the whole cohort of students completed the questionnaire? Or 84 of the 134 third year students? Created for what purpose? Please add some more information here. What were you asking the students?

The anonymous questionnaire was filled in by 94 students in total. Amongst the aims was for them to evaluate the virtual fieldtrip and how it contributed to their better understanding of geomorphological topics. We will add more details regarding the questionnaire in the methods section and we will also include the link to the questionnaire.

132-133 It is useful to know the reasons why the region was chosen, such as you have done here. Much of the detail in Section 3 is superfluous, and unless it is directly relevant to the aims of the study, I'd advise removing much of it, or explaining why the detail is important to include in this particular paper.

Thank you for this comment. Taking also into consideration a similar comment from Solmaz Mohadjer, we will try to shorten some parts of section 3 and explain better how and why each topic was approached.

Figure 5 is very poor quality.

We will upgrade this figure, thank you for the comment.

I'm afraid I stopped reviewing at this point as the discussion and conclusions are not original contributions to research (see general comments).

#### Technical comments

Be consistent with your use of fieldtrip or field trip, fieldwork or field work.

7 I'd advise changing the word prosecution throughout the manuscript. It has two meanings in English.

12 Be consistent throughout with your use of live, real or actual field trip. I would recommend actual.

28 I suggest moving this sentence before the previous and slightly developing the sentence which you provide a reference by Clark. Are you talking here about the power of field trips as shared experiences? If so, please provide a little more information.

31 Advise using students or participants instead of 'attendants'

47 Can be not they are 48 some not most

81 to not at

104 no need to tell us which programme you used to create your map

Thank you for these detailed technical comments, we will make all the suggested changes in our revised manuscript.
