# Supplementary material for: Interactive virtual fieldtrip as a tool for remote education
Source: Copernicus journal article supplement (doi:10.5194/gc-2021-21), 2021-07-21
Supplement: Supplementary file [file gc-2021-21-RC1-supplement.pdf]

Review of Paper **Interactive virtual fieldtrip as a tool for remote education.**

Reviewer Denise Balmer

The paper suggests that virtual fieldwork during the Covid-19 pandemic could be used as a tool for examining field study areas and plenty of information is supplied. The paper suggests advantages and disadvantages of virtual against actual fieldwork but does state that virtual fieldwork should not be a substitute for actual fieldwork. However, this paper does not give any specific objectives for the students to study although it suggests under the discussion section that they were looking at geomorphological principles. There is no questionnaire given on which the evaluation discussion is based. It is stated that the students seemed to recommend the idea of Virtual Field Trips although there is no mention of follow up actual field work here.

The idea of virtual fieldwork is useful as a precursor to actual fieldwork, and the paper is interesting from that viewpoint.

I was not able to access the story map at the given point.

I found some difficulty with some of the language use, possibly because of translation issues and have suggested alternatives below. This looks excessive but will add to the ease of reading.

Line 7 and line 30: prosecution to be replaced with execution

Line 31: participants rather than attendants

Line 40: prosecute to be replaced with undertake

Line 45: prosecution replaced with running

Line 63 consequent by subsequent

Line 64 should read alternative TO the field trip

Line 81 should read presented TO students

Line 127: lower or flatter rather than milder

Line 208: should read preventing the moisture penetrating into the room

Line 224: perhaps 'in most coasts' be replaced with 'along most of the shoreline'

Line 229: should read 'artificial beachworks physical properties were LATER studied...

Line 236: should read 'interesting and AIDED the understanding...

Line 273: abilities be replaced with opportunities

An interesting article contrasting Virtual and Actual fieldwork has just appeared in the Teaching Earth Sciences magazine , Vol 46, 1 and 2 for 2021, pp 30 to 33, by Jordan Phethean ([i.phethean@derby.ac.uk](mailto:i.phethean@derby.ac.uk)) which might be of interest.
